# Supplementary material for: Small Extracellular Vesicles in Pre-Therapy Plasma Predict Clinical Outcome in Non-Small-Cell Lung Cancer Patients
Source: MDPI journal article supplement (doi:10.3390/cancers13092041), 2021-04-23

Original images of blots and densitometric analysis  
Figure 1C

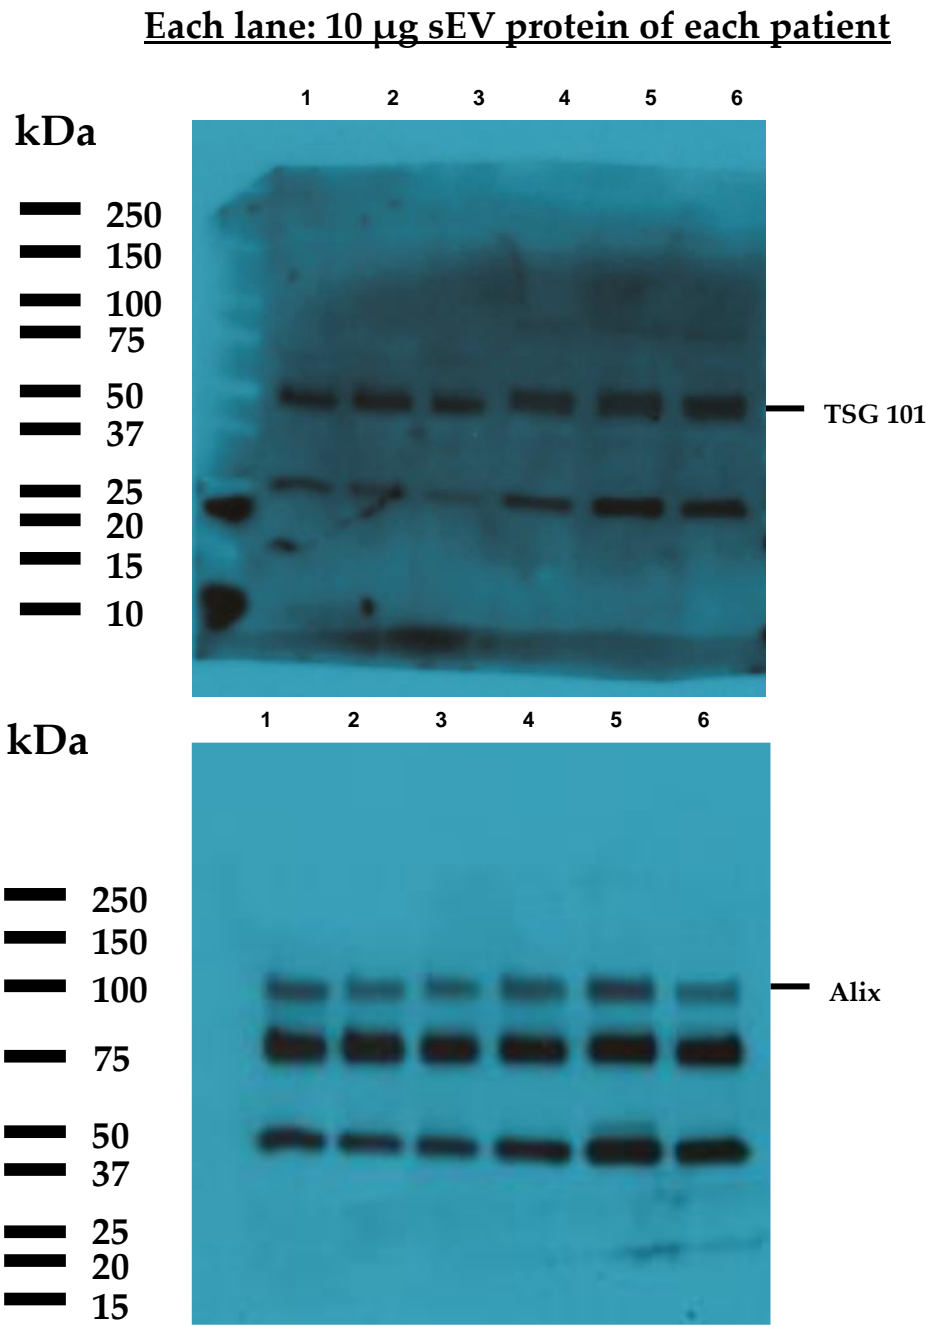

## Densitometry analysis

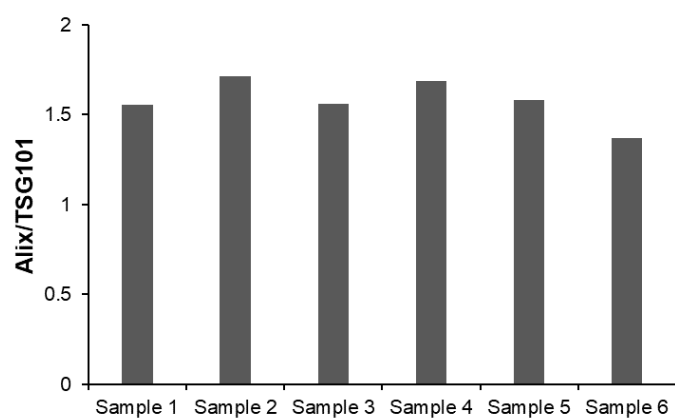

## Original images of blots

Figure 2A

Each lane: 10  $\mu$ g sEV protein of patient (Pt) or healthy donor (HD)

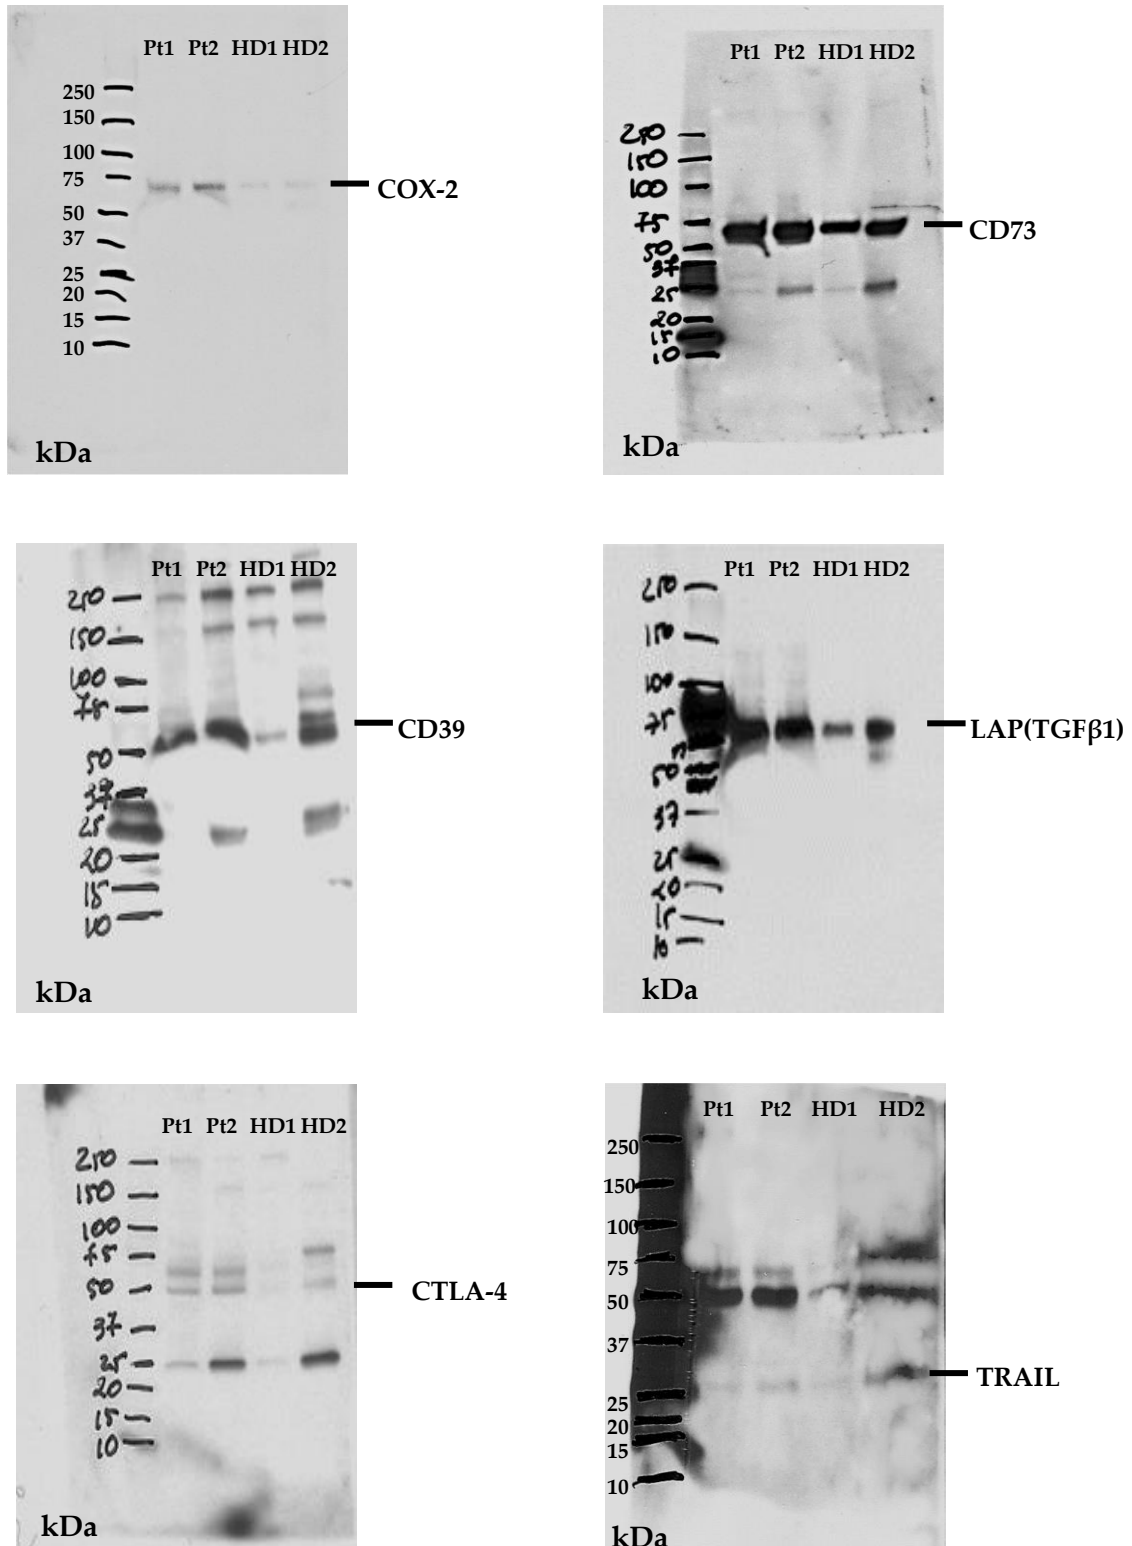

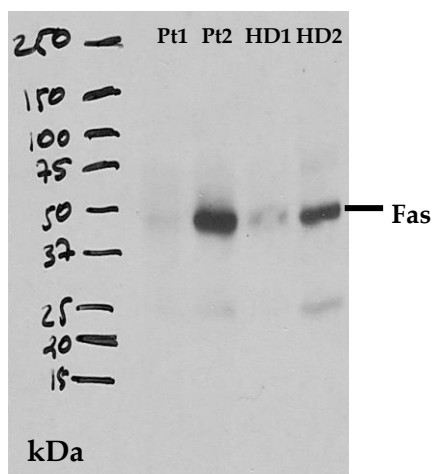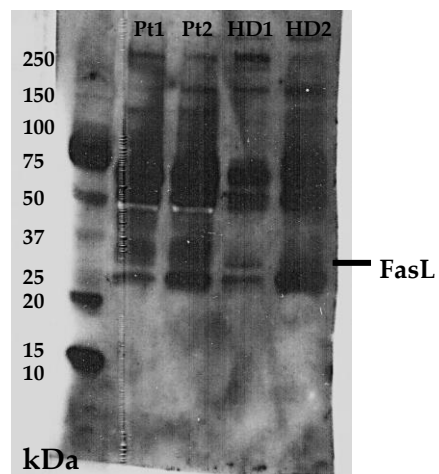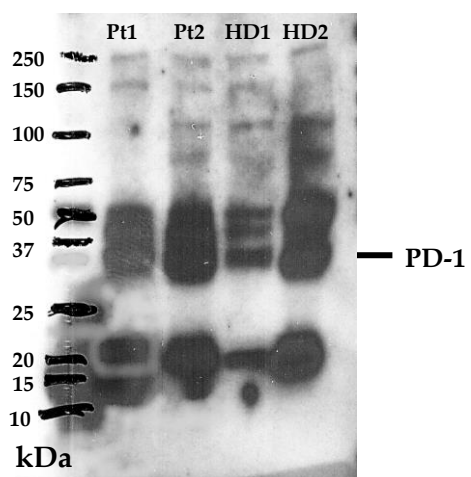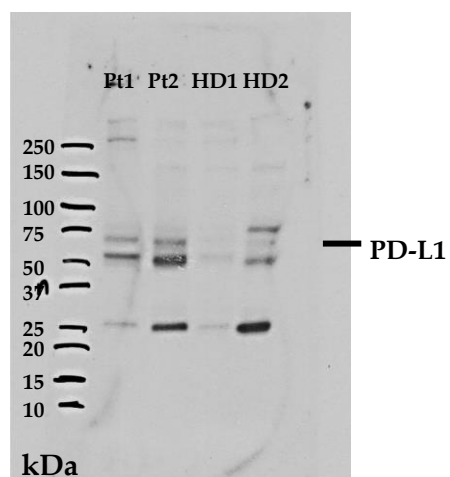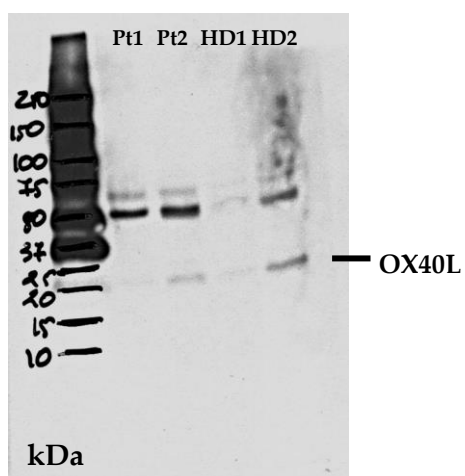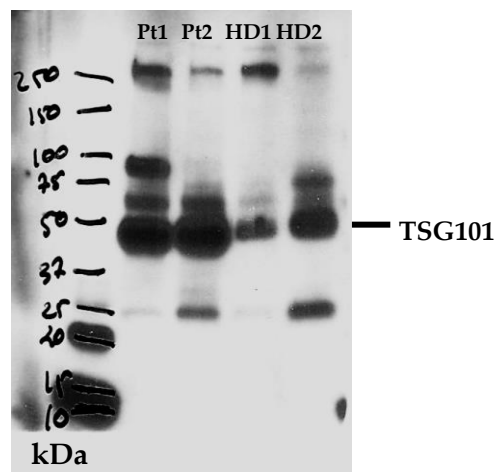

Supplement: s1 [file s1]
